# Supplementary material for: Clinical Activity of an hTERT-Specific Cancer Vaccine (Vx-001) in “Immune Desert” NSCLC
Source: PubMed Central journal article supplement (PMC8037524; doi:10.3390/cancers13071658), 2021-04-01
Supplement: cancers-13-01658-s001.pdf [file cancers-13-01658-s001.pdf]

# Supplementary materials: Clinical Activity of an hTERT-Specific Cancer Vaccine (Vx-001) in “Immune Desert” NSCLC

I. S. Pateras, A. Kotsakis, M. Avgeris, E. Baliou, P. Kouroupakis, E. Patsea, V. Georgoulas, J. Menez-Jamet, J. P. Kinet and Kostas Kosmatopoulos

**Table S1.** Correlation of TAIC with CD3- and CD8- TILs.

| Tumor-associated immune cells (TAIC) |                                       |            |                              |
|--------------------------------------|---------------------------------------|------------|------------------------------|
| Covariant                            | Low                                   | High       | <i>p</i> -value <sup>a</sup> |
| <b>CD3-TILs</b>                      |                                       |            |                              |
| Low                                  | 30 <sup>b</sup> (68.2% <sup>c</sup> ) | 15 (24.6%) | <0.001                       |
| High                                 | 14 (31.8%)                            | 46 (75.4%) |                              |
| <b>CD8-TILs</b>                      |                                       |            |                              |
| Low                                  | 29 (65.9%)                            | 13 (22.8%) | <0.001                       |
| High                                 | 15 (34.1%)                            | 44 (77.2%) |                              |

<sup>a</sup> Fisher’s Exact test. <sup>b</sup> Number of patients. <sup>c</sup> % percentage within TAIC.

**Table S2.** Correlation of PD-L1, TAIC, CD3- TILs, CD8-TILs and GZMB-TILs with patients’ clinicopathological data.

| Covariant        | Gender                |            | <i>p</i> <sup>a</sup> | Age     |          | <i>p</i> <sup>a</sup> | Prior treatment response |                 |                       | Histology            |                 | <i>p</i> <sup>a</sup> | Smoking  |     | <i>p</i> <sup>a</sup> |         |
|------------------|-----------------------|------------|-----------------------|---------|----------|-----------------------|--------------------------|-----------------|-----------------------|----------------------|-----------------|-----------------------|----------|-----|-----------------------|---------|
|                  | Male                  | Female     |                       | <65y    | ≥65y     |                       | OR <sup>d</sup>          | SD <sup>e</sup> | <i>p</i> <sup>a</sup> | NSQ/M H <sup>f</sup> | SQ <sup>g</sup> |                       | No       | Yes |                       |         |
| <b>PD-L1</b>     | 75 <sup>b</sup>       | 26         | 0.486                 | 48      | 53       | 0.838                 | 46                       | 55              | 0.100                 | 59                   | 42              | 0.677                 | 92       | 26  | 3                     |         |
| Negative         | (53.7% <sup>c</sup> ) | (19.8%)    |                       | (36.6%) | (40.5%)  |                       | (35.1%)                  | (42.0%)         |                       | (45.0%)              | (32.1%)         |                       | 9 (6.9%) |     |                       | (70.2%) |
| Positive         | 20 (15.3%)            | 10 (7.6%)  |                       | (11.5%) | (11.5%)  |                       | (14.5%)                  | 11 (8.4%)       |                       | (12.2%)              | (10.7%)         |                       | 4 (3.1%) |     |                       | (19.8%) |
| <b>TAIC</b>      | 40                    | 20         | 0.176                 | 32      | 28       | 0.296                 | 31                       | 29              | 0.727                 | 35                   | 25              | 0.861                 | 54       | 64  | 1.000                 |         |
| Low              | (30.5%)               | (15.3%)    |                       | (24.4%) | (21.4%)  |                       | (23.7%)                  | (22.1%)         |                       | (26.7%)              | (19.1%)         |                       | 6 (4.6%) |     |                       | (41.2%) |
| High             | 55 (42.0%)            | 16 (12.2%) |                       | (23.7%) | (30.5%)  |                       | (26.0%)                  | (28.2%)         |                       | (30.5%)              | (23.7%)         |                       | 7 (5.3%) |     |                       | (48.9%) |
| <b>CD3-TILs</b>  | 35                    | 10 (9.5%)  | 0.508                 | 22      | 23       | 1.000                 | 23                       | 22              | 0.846                 | 27                   | 18              | 0.554                 | 40       | 54  | 1.000                 |         |
| Low              | (33.3%)               | (16.2%)    |                       | (21.0%) | (21.9%)  |                       | (21.9%)                  | (21.0%)         |                       | (25.7%)              | (17.1%)         |                       | 5 (4.8%) |     |                       | (38.1%) |
| High             | 43 (41.0%)            | 17 (16.2%) |                       | (28.6%) | (28.6%)  |                       | (30.5%)                  | (26.7%)         |                       | (30.5%)              | (26.7%)         |                       | 6 (5.7%) |     |                       | (51.4%) |
| <b>CD8-TILs</b>  | 32                    | 10 (9.9%)  | 0.506                 | 21      | 21       | 0.842                 | 22                       | 20              | 0.549                 | 23                   | 19              | 0.842                 | 37       | 54  | 0.738                 |         |
| Low              | (31.7%)               | (17.8%)    |                       | (20.8%) | (20.8%)  |                       | (21.8%)                  | (19.8%)         |                       | (22.8%)              | (18.8%)         |                       | 5 (5.0%) |     |                       | (36.6%) |
| High             | 41 (40.6%)            | 18 (17.8%) |                       | (27.7%) | (30.7%)  |                       | (26.7%)                  | (31.7%)         |                       | (30.7%)              | (27.7%)         |                       | 5 (5.0%) |     |                       | (53.5%) |
| <b>GZMB-TILs</b> | 51                    | 19         | 1.000                 | 30      | 40       | 0.153                 | 36                       | 34              | 0.782                 | 39                   | 31              | 1.000                 | 64       | 13  | 6                     |         |
| Low              | (60.0%)               | (22.4%)    |                       | (35.3%) | (47.1%)  |                       | (42.4%)                  | (40.0%)         |                       | (45.9%)              | (36.5%)         |                       | 6 (7.1%) |     |                       | (75.3%) |
| High             | 11 (12.9%)            | 4 (4.7%)   |                       | (11.8%) | 5 (5.9%) |                       | 7 (8.2%)                 | 8 (9.4%)        |                       | 8 (9.4%)             | 7 (8.2%)        |                       | 2 (2.4%) |     |                       | (15.3%) |

<sup>a</sup> Fisher’s Exact test, <sup>b</sup> Number of patients, <sup>c</sup> % percentage of total patients, <sup>d</sup> Optimal response, <sup>e</sup> Stable disease, <sup>f</sup> Non-squamous/mixed histology, <sup>g</sup> Squamous.

**Table S3.** Distribution of gender, age, response to previous treatment, tumor histology and smoking behaviour in Vx-001 and placebo-treated arms.

| Covariant                             | Vaccination                           |            | p-value <sup>a</sup> |
|---------------------------------------|---------------------------------------|------------|----------------------|
|                                       | Placebo                               | Vx-001     |                      |
| <b>Gender</b>                         |                                       |            |                      |
| Male                                  | 51 <sup>b</sup> (38.9% <sup>c</sup> ) | 44 (33.6%) | 0.560                |
| Female                                | 17 (13.0%)                            | 19 (14.5%) |                      |
| <b>Age</b>                            |                                       |            |                      |
| <65y                                  | 32 (24.4%)                            | 31 (23.7%) | 0.862                |
| ≥65y                                  | 36 (27.5%)                            | 32 (24.4%) |                      |
| <b>Response to previous treatment</b> |                                       |            |                      |
| OR <sup>d</sup>                       | 38 (29.0%)                            | 27 (20.6%) | 0.163                |
| SD <sup>e</sup>                       | 30 (22.9%)                            | 36 (27.5%) |                      |
| <b>Histology</b>                      |                                       |            |                      |
| NSQ/MH <sup>f</sup>                   | 41 (31.3%)                            | 34 (26.0%) | 0.485                |
| SQ <sup>g</sup>                       | 27 (20.6%)                            | 29 (22.1%) |                      |
| <b>Smoking</b>                        |                                       |            |                      |
| No                                    | 7 (5.3%)                              | 6 (4.6%)   | 1.000                |
| Yes                                   | 61 (46.6%)                            | 57 (43.5%) |                      |

<sup>a</sup> Fisher's Exact test, <sup>b</sup> Number of patients, <sup>c</sup> % percentage of total patients, <sup>d</sup> Optimal response, <sup>e</sup> Stable disease, <sup>f</sup> non-squamous/mixed histology, <sup>g</sup> squamous.

**Table S4.** OS in patients with PD-L1(+), TAIC high, CD3-TIL high, CD8-TIL high or GZMB-TIL high tumors.

| Patients             | OS (months) |        | HR <sup>a</sup> | 95% CI <sup>b</sup> | log-rank p value |
|----------------------|-------------|--------|-----------------|---------------------|------------------|
|                      | Placebo     | Vx-001 |                 |                     |                  |
| PD-L1(+) (n=30)      | 24.9        | 7.9    | 1.646           | 0.647-4.186         | 0.291            |
| TAIC high (n=71)     | 16.3        | 14.3   | 1.463           | 0.850-2.517         | 0.166            |
| CD3-TIL high (n=60)  | 16.3        | 10.0   | 1.599           | 0.895-2.856         | 0.109            |
| CD8-TIL high (n=59)  | 16.3        | 12.7   | 1.501           | 0.832-2.709         | 0.174            |
| GZMB-TIL high (n=15) | 21.0        | 4.6    | 3.751           | 1.022-13.77         | 0.034            |

<sup>a</sup> Hazard Ratio, <sup>b</sup> 95% confidence interval of the estimated HR.

**Table S5.** TTF in patients with PD-L1(+), TAIC high, CD3-TIL high, CD8-TIL high or GZMB-TIL high tumors.

| Patients             | TTF (months) |        | HR <sup>a</sup> | 95% CI <sup>b</sup> | log-rank p value |
|----------------------|--------------|--------|-----------------|---------------------|------------------|
|                      | Placebo      | Vx-001 |                 |                     |                  |
| PD-L1(+) (n=30)      | 3.0          | 3.5    | 1.344           | 0.615-2.934         | 0.437            |
| TAIC high (n=71)     | 2.8          | 2.3    | 1.040           | 0.639-1.693         | 0.869            |
| CD3-TIL high (n=60)  | 3.0          | 2.3    | 1.201           | 0.701-2.058         | 0.484            |
| CD8-TIL high (n=59)  | 3.0          | 2.3    | 1.208           | 0.705-2.068         | 0.473            |
| GZMB-TIL high (n=15) | 2.8          | 2.0    | 1.043           | 0.362-3.005         | 0.936            |

<sup>a</sup> Hazard Ratio, <sup>b</sup> 95% confidence interval of the estimated HR.

## CD8/GZMB double staining

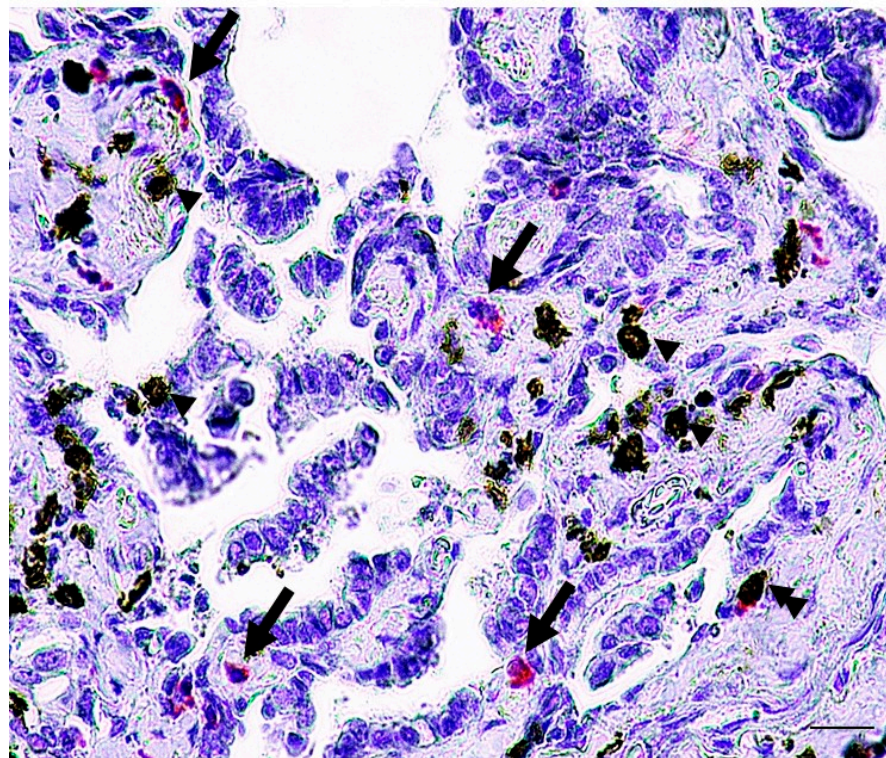

**Figure S1.** CD8-GZMB double staining. CD8 (brown, single arrowheads) – GZMB (red, single arrows). Double arrowhead depict CD8+GZMB+ cells. Scale bar: 20 $\mu$ m.

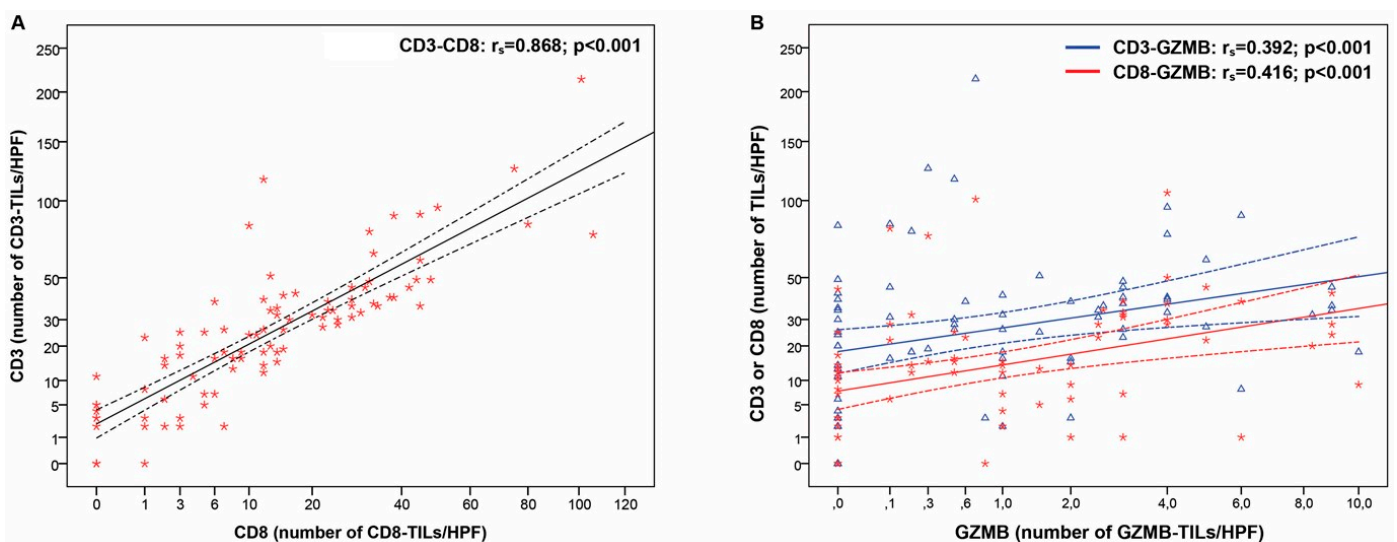

**Figure S2.** Correlation of CD3-TILs, CD8-TILs and GZMB-TILs. Scatter plots in power scale of (A) CD3-TILs and CD8-TILs and (B) GZMB-TILs with CD3-TILs (blue) or CD8-TILs (red). The  $p$  values are calculated by Spearman correlation analysis. The solid lines represent linear regression trendlines and dashed lines indicate 95% confidence intervals.  $r_s$ : Spearman correlation coefficient.

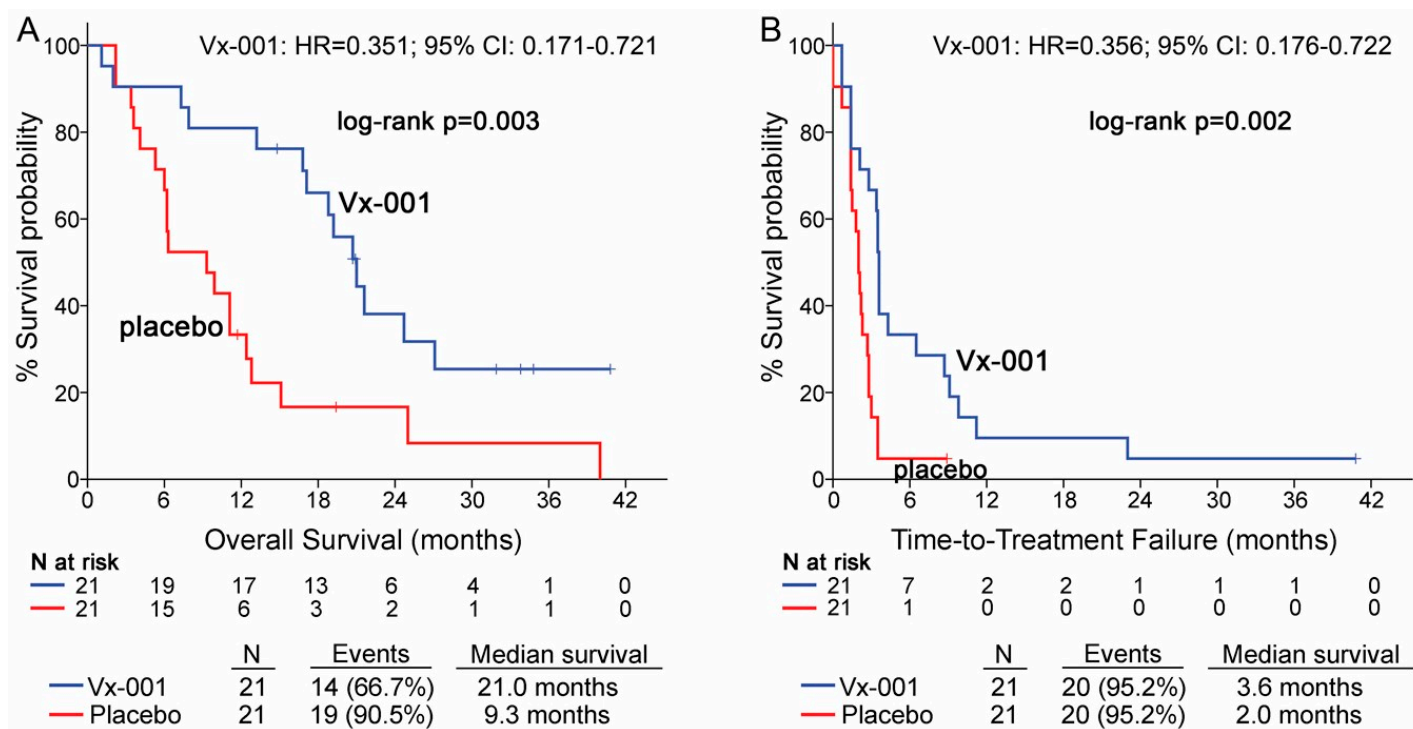

Figure S3. OS (A) and TTF (B) in patients with tumors lacking CD8-TIL/GZMB double positive cells.

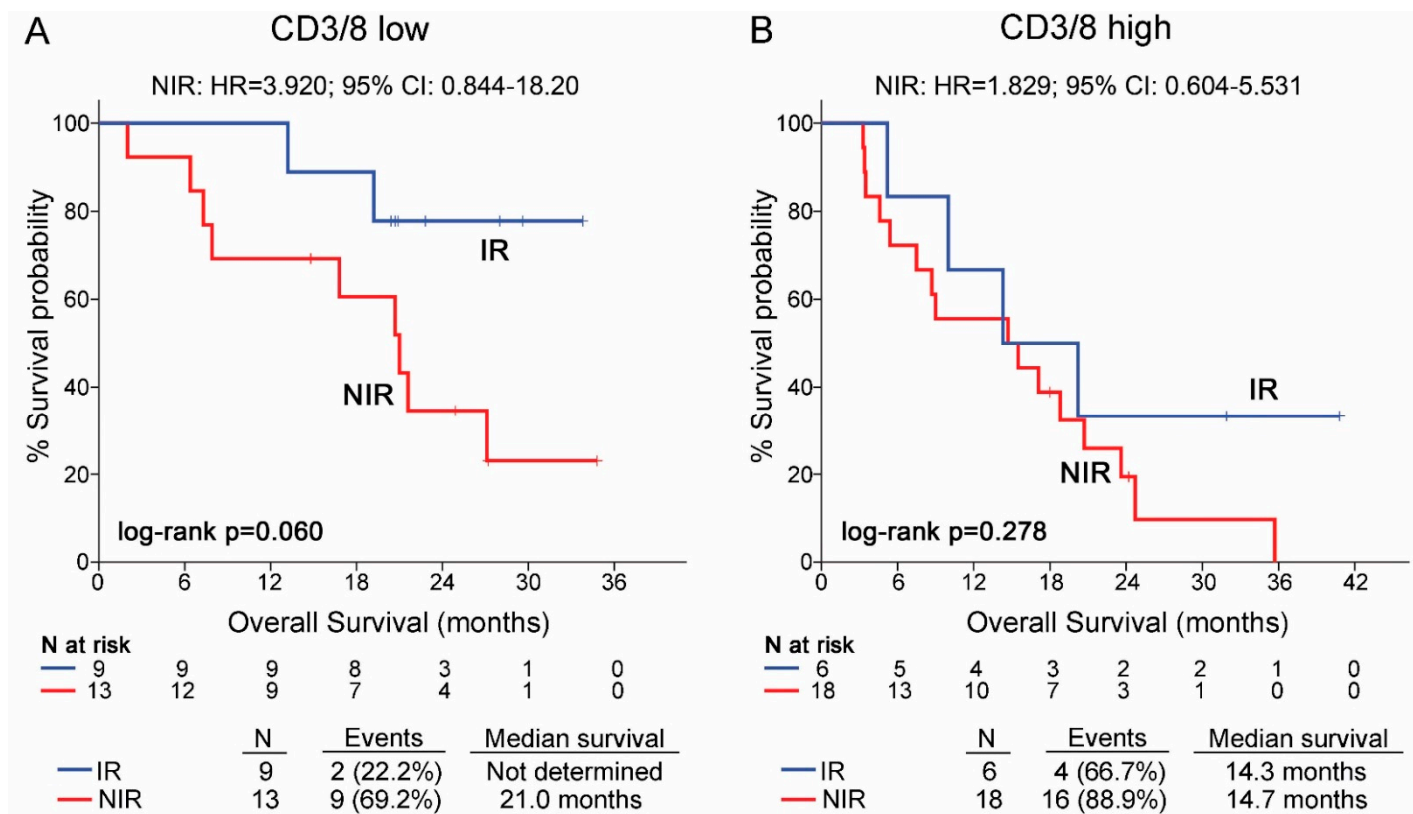

Figure S4. : Correlation of Vx-001 induced immune response and OS in patients with CD3/8-TIL low (A) and CD3/8-TIL high (B) tumors. IR: immune responders, NIR: Non immune responders.
